# Supplementary material
Source: Research Square preprint supplement (doi:10.21203/rs.3.rs-9618508/v1)
Supplement: Supplementary file 1 [file eca3e5094fe9b7fc542ea796.docx]

**Supplementary fig. 1| Gating strategy and frequency of CHIKV-infected and ISG15+ PBMCs.** Human PBMCs (n= 3) were exposed to CHIKV or UV-CHIKV as shown in Fig. 1A. Representative figures of (A) Gating strategy, (B) frequency of CHIKV-E2+ PBMCs. Monocytes were enriched by negative selection from PBMCs isolated from healthy donors and then (mock)- infected with CHIKV at MOI 10 for 48 hpi. (C) Frequencies of classical (CM, CD14++, CD16-), intermediate (IM, CD14++, CD16+), and non-classical monocytes (NM, CD14dim, CD16+) were evaluated by flow cytometry. Data is presented as mean ± SD, n= 3. Human PBMCs were either uninfected (mock) or infected with CHIKV or UV-CHIKV (Fig. 1A). (D) Representative MFI histograms of intracellular ISG15 accumulation in PBMCs subsets. n= 3.

**Supplementary fig. 2| Induction of pro-inflammatory and antiviral factors in PBMCs upon exposure to CHIKV.** Human PBMCs (n= 3) were uninfected or infected with CHIKV or UV-CHIKV (Fig. 1A). Gene expression (mRNA) is expressed as Log2FC heatmaps and transcripts per million (TPM). mRNA expression of (A) the NF-kB complex and interferon regulatory factors, (B) CC- and CXC-motive chemokines, and (C) JAK-STAT signaling components. TPM are presented as mean ± SD.

**Supplementary fig. 3| HUVEC assay controls.** Primary human umbilical vein endothelial cells (HUVECs) were incubated for 6 h with (A) TLRs agonist, 50% culture supernatant harvested from PBMCs exposed to (B) TLR3, (C) TLR4, or (D) TLR7/8 inhibitors and/or agonists; or (E) exposed to human-recombinant IFN-β or infective CHIKV (MOI 10). The induction of E-selectin, ICAM-1, VCAM-1, and ISG15 was evaluated by flow cytometry and presented as frequency histograms (n= 2).

**Supplementary fig. 4| Induction of adhesion molecules transcripts in PBMCs upon exposure to CHIKV-.** Human PBMCs (n= 3) were exposed CHIKV or UV-CHIKV as depicted in Fig. 1A. Gene expression (mRNA) is expressed as transcripts per million (TPM). mRNA expression of adhesion molecules. TPM are presented as mean ± SD.
